# Supplementary material for: Hydrolysis of mixed Ni2+–Fe3+ and Mg2+–Fe3+ solutions and mechanism of formation of layered double hydroxides
Source: Royal Society of Chemistry journal article supplement (doi:10.1039/c3dt51521d), 2013-01-01
Supplement: c3dt51521d.pdf [file c3dt51521d.pdf]

# Supporting information

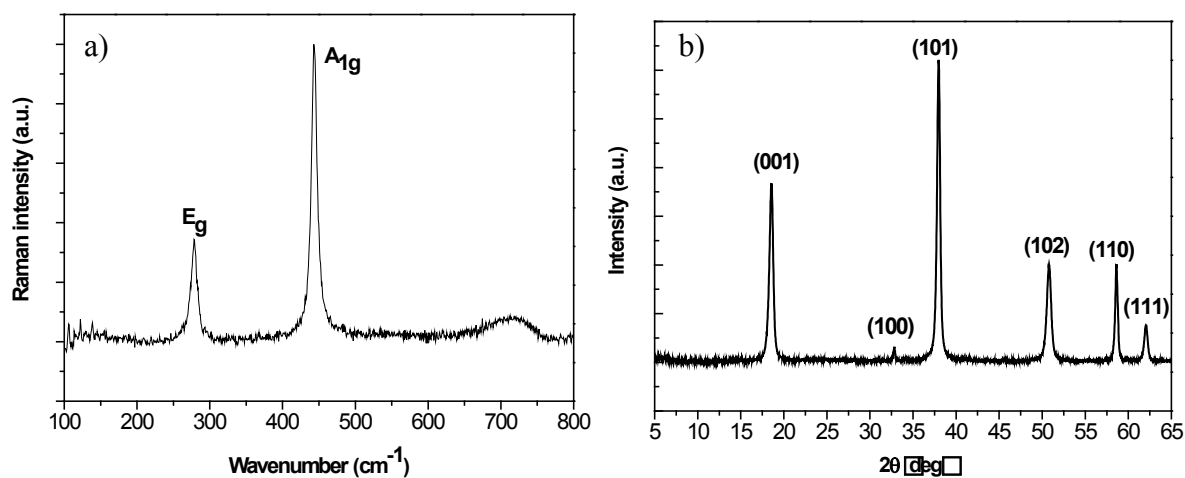

Figure S1 : Raman spectra (a) and XRD patterns (b) of the solid phase obtained at the end of the Mg<sup>2+</sup> solution titration

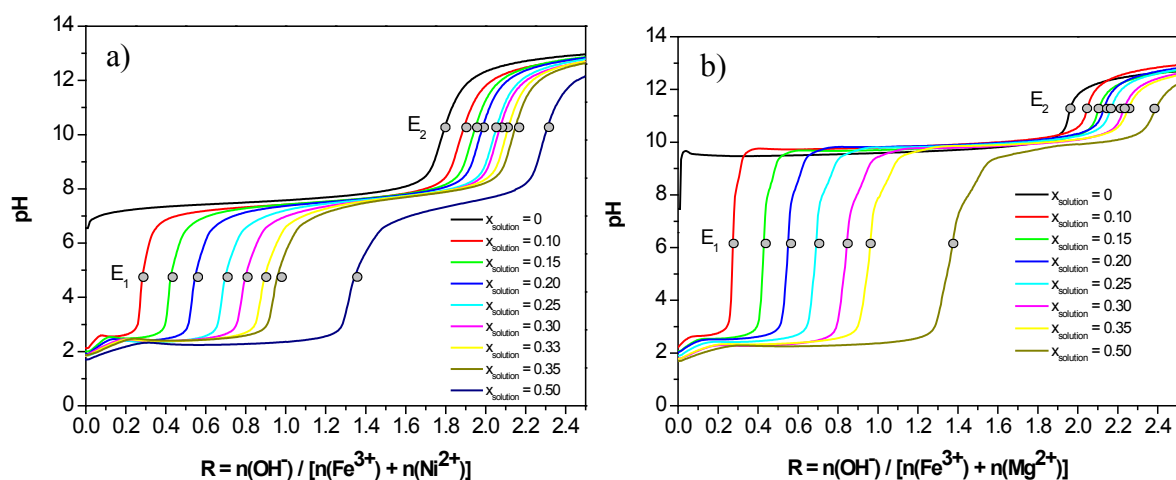

Figure S2 : Titration curves for different  $x_{\text{solution}}$  for (a) Ni<sup>2+</sup>-Fe<sup>3+</sup> mixed cation solutions and (b) Mg<sup>2+</sup>-Fe<sup>3+</sup> mixed cation solutions

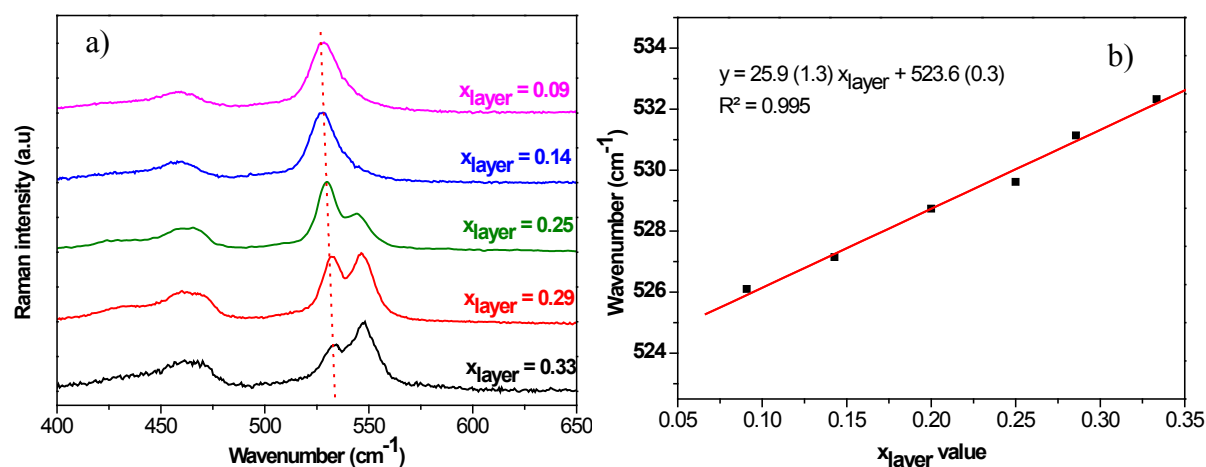

Figure S3 : (a) Raman spectra of Ni<sup>II</sup>-Fe<sup>III</sup> LDH with different  $x_{\text{layer}}$  values and (b) correlation between the wavenumber of the LDH Raman band and the  $x_{\text{layer}}$  values. The numbers in brackets refer to the standard deviation for each parameter of the linear regression.

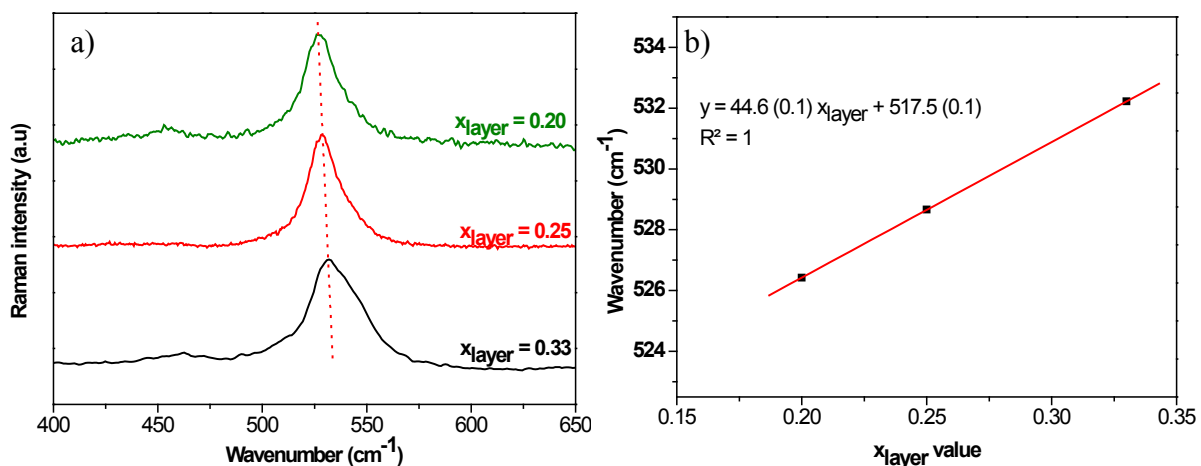

Figure S4 : (a) Raman spectra of Mg<sup>II</sup>-Fe<sup>III</sup> LDH with different  $x_{\text{layer}}$  values and (b) correlation between the wavenumber of the LDH Raman band and the  $x_{\text{layer}}$  values. The numbers in brackets refer to the standard deviation for each parameter of the linear regression.

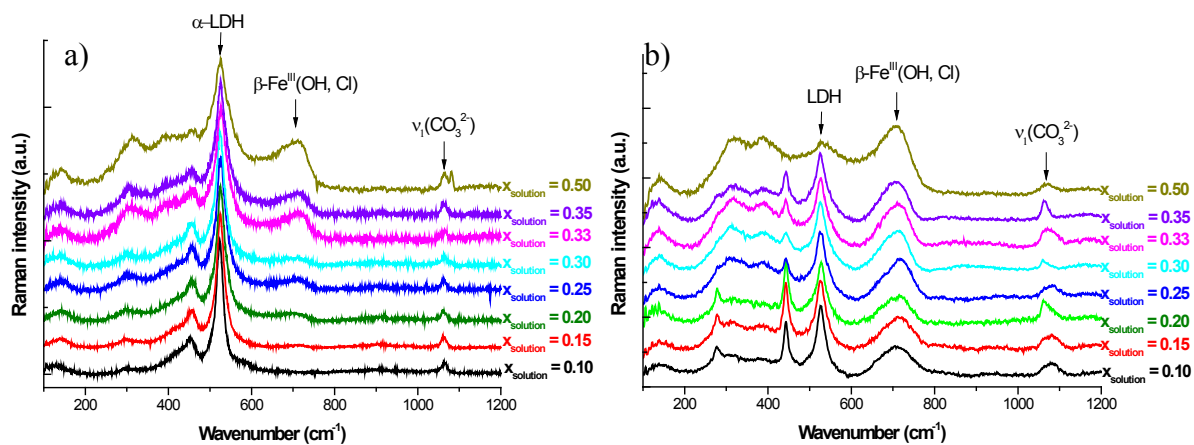

Figure S5 : Raman spectra in the spectral range 100-1200 cm<sup>-1</sup> (a) same as Figure 8a and (b) same as Figure 12a
